# Supplementary material for: Rhodium-mediated hydrogenolysis/hydrolysis of the aryl ether bond in supercritical carbon dioxide/water: an experimental and theoretical approach
Source: Royal Society of Chemistry journal article supplement (doi:10.1039/c4cy01417k), 2014-11-27

### Supporting information

Figure S1: Pressure dependent solubility of DPE in high-pressure CO<sub>2</sub>: (a) initial, (b) 7 MPa, (c) 10 MPa and (d) 16 MPa

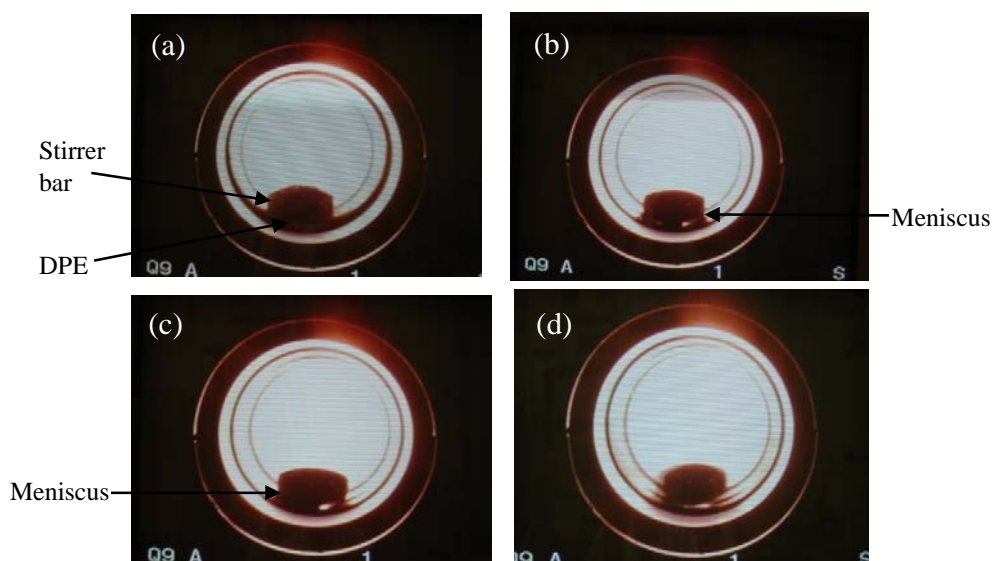

Figure S2: *In-situ* UV-vis spectra of diphenyl ether (DPE), phenol (PhOH) and conversion of DPE at 10 MPa

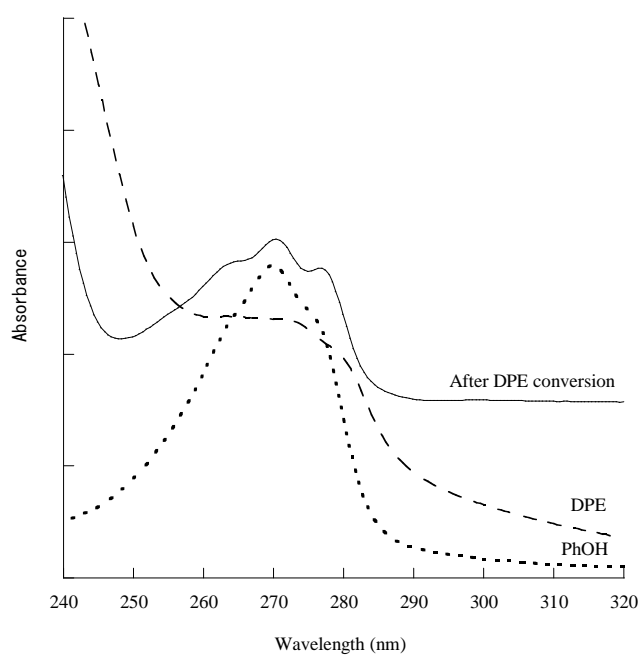

Figure S3: Catalyst recycling

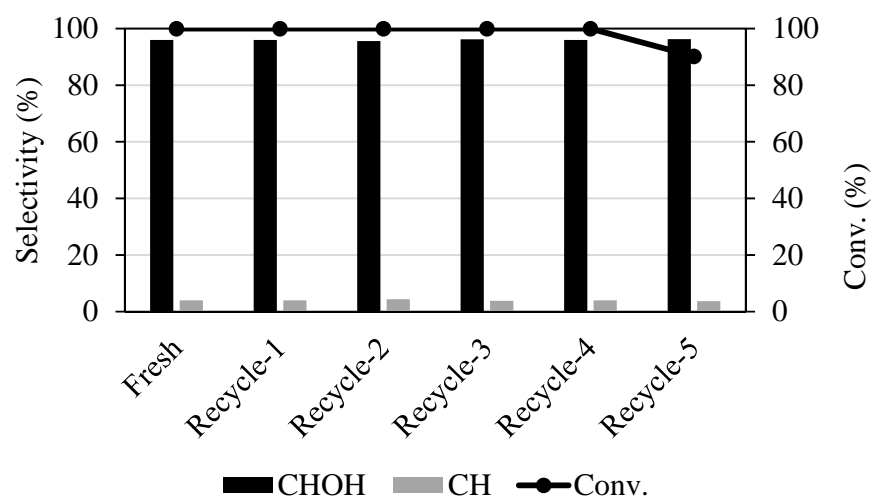

Figure S4: TEM images of catalyst (a) before and (b) after reaction

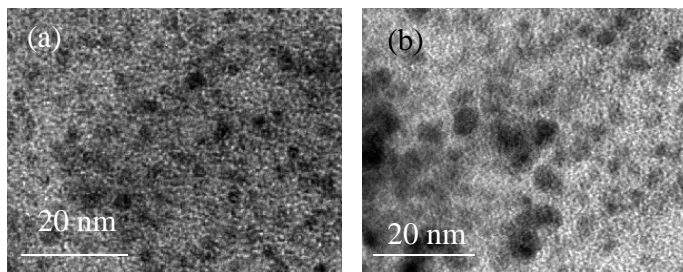

Supplement: c4cy01417k1.pdf [file c4cy01417k1.pdf]
